# Supplementary material
Source: Springer Nature journal article supplement (https://www.springermedizin.de/resource/supplementary/12886_2010_192_MOESM1_ESM.pdf/9473506)
Supplement: MOESM1 [file 9473506]

Day -1

Glaucoma patients scheduled for phaco-trabeculectomy

- Baseline examination (routine examination for any scheduled patient)
- Eligibility assessment
- Consent
- Study inclusion
- Baseline Tests (Vital signs, urine test for proteinuria, slit lamp-examination, flare meter measurement)

Day 0

Surgery (phaco-trabeculectomy)

Day 1

definitive study inclusion, start of treatment

|         | Treatment | Examinations |       |           |       |          |           |
|---------|-----------|--------------|-------|-----------|-------|----------|-----------|
|         |           | Vital signs  | Urine | Slit lamp | Photo | AC Flare | Interview |
| Day 1   | x         | x            | x     | x         | x     | x        | x         |
| Day 2   | x         | x            |       | x         |       | x        | x         |
| Day 3   | x         | x            |       | x         |       | x        | x         |
| Day 4   | x         | x            |       | x         |       | x        | x         |
| Day 5   | x         | x            |       | x         |       | x        | x         |
| Day 6   | x         | x            |       | x         |       | x        | x         |
| Week 1  | x         | x            | x     | x         | x     | x        | x         |
| Week 2  | x         | x            | x     | x         | x     | x        | x         |
| Week 3  | x         | x            | x     | x         | x     | x        | x         |
| Month 1 | x         | x            | x     | x         | x     | x        | x         |
| Month 2 |           | x            | x     | x         | x     | x        | x         |
